# Supplementary material for: Methylation cytometric pretreatment blood immune profiles with tumor mutation burden as prognostic indicators for survival outcomes in head and neck cancer patients on anti-PD-1 therapy
Source: PubMed Central journal article supplement — NPJ Precis Oncol. 2024 Nov 18;8:267. doi: 10.1038/s41698-024-00759-8 (PMC11573993; doi:10.1038/s41698-024-00759-8), 2024-11-18
Supplement: 41698_2024_759_MOESM1_ESM.pdf [file 41698_2024_759_MOESM1_ESM.pdf]

# Supplementary Materials

## Methylation cytometric pretreatment blood immune profiles with tumor mutation burden as prognostic indicators for survival outcomes in head and neck cancer patients on anti-PD-1 therapy

Ze Zhang, Kartik Sehgal, Keisuke Shirai, Rondi A Butler, John K Wiencke, Devin C Koestler, Geat Ramush, Min Kyung Lee, Annette M Molinaro, Hannah G Stolrow, Ariel Birnbaum, Lucas A Salas, Robert I Haddad, Karl T Kelsey, Brock C Christensen

\*Co-first authors

### Table of Contents

|                                                                                                                                                                                                                                                                                                                                    |    |
|------------------------------------------------------------------------------------------------------------------------------------------------------------------------------------------------------------------------------------------------------------------------------------------------------------------------------------|----|
| <b>Supplementary Figure 1.</b> Study design and analysis pipelines for TMB .....                                                                                                                                                                                                                                                   | 3  |
| <b>Supplementary Figure 2.</b> Study design and analysis pipelines for PD-L1 CPS.....                                                                                                                                                                                                                                              | 4  |
| <b>Supplementary Figure 3.</b> Multidimensional scaling plot by medical center.....                                                                                                                                                                                                                                                | 5  |
| <b>Supplementary Figure 4.</b> TMB and PDL1-CPS comparison between the benefit and non-benefit groups .                                                                                                                                                                                                                            | 6  |
| <b>Supplementary Figure 5.</b> Kaplan–Meier plots for progression-free survival in anti-PD-1 monotherapy....                                                                                                                                                                                                                       | 7  |
| <b>Supplementary Figure 6.</b> Kaplan–Meier plots for overall survival in anti-PD-1 monotherapy.....                                                                                                                                                                                                                               | 8  |
| <b>Supplementary Figure 7.</b> Kaplan–Meier plots for progression-free survival in all-treatment.....                                                                                                                                                                                                                              | 9  |
| <b>Supplementary Figure 8.</b> Kaplan–Meier plots for overall survival in all-treatment .....                                                                                                                                                                                                                                      | 10 |
| <b>Supplementary Figure 9.</b> DFCI vs all center anti-PD-1 monotherapy immune variable with PFS and OS .                                                                                                                                                                                                                          | 11 |
| <b>Supplementary Figure 10.</b> C-index comparison by removing variables in survival models.....                                                                                                                                                                                                                                   | 12 |
| <b>Supplementary Figure 11.</b> TMB and PD-L1 CPS with survival outcomes in all-treatment.....                                                                                                                                                                                                                                     | 13 |
| <b>Supplementary Figure 12.</b> TMB and progression-free survival stratified by median NK count and Neu count .....                                                                                                                                                                                                                | 14 |
| <b>Supplementary Figure 13.</b> Pearson’s r between pretreatment TMB and immune variables.....                                                                                                                                                                                                                                     | 15 |
| <b>Supplementary Table 1.</b> Immune variables abbreviations, and their calculations.....                                                                                                                                                                                                                                          | 16 |
| <b>Supplementary Table 2.</b> Immune profile comparison between HNSCC patients and WHI subjects.....                                                                                                                                                                                                                               | 17 |
| <b>Supplementary Table 3.</b> Baseline characteristics of the study population for TMB.....                                                                                                                                                                                                                                        | 18 |
| <b>Supplementary Table 4.</b> Baseline characteristics of the study population for PD-L1 CPS.....                                                                                                                                                                                                                                  | 19 |
| <b>Supplementary Table 5.</b> Significant associations between immune variables as binary variables and <b>A.</b> progression-free survival in anti-PD-1 monotherapy; <b>B.</b> overall survival in anti-PD-1 monotherapy; <b>C.</b> progression-free survival in all-treatment; <b>D.</b> overall survival in all-treatment ..... | 20 |

**Supplementary Table 6.** Significant TMB and peripheral immune variable interactions on **A.** progression-free survival; **B.** overall survival ..... 21

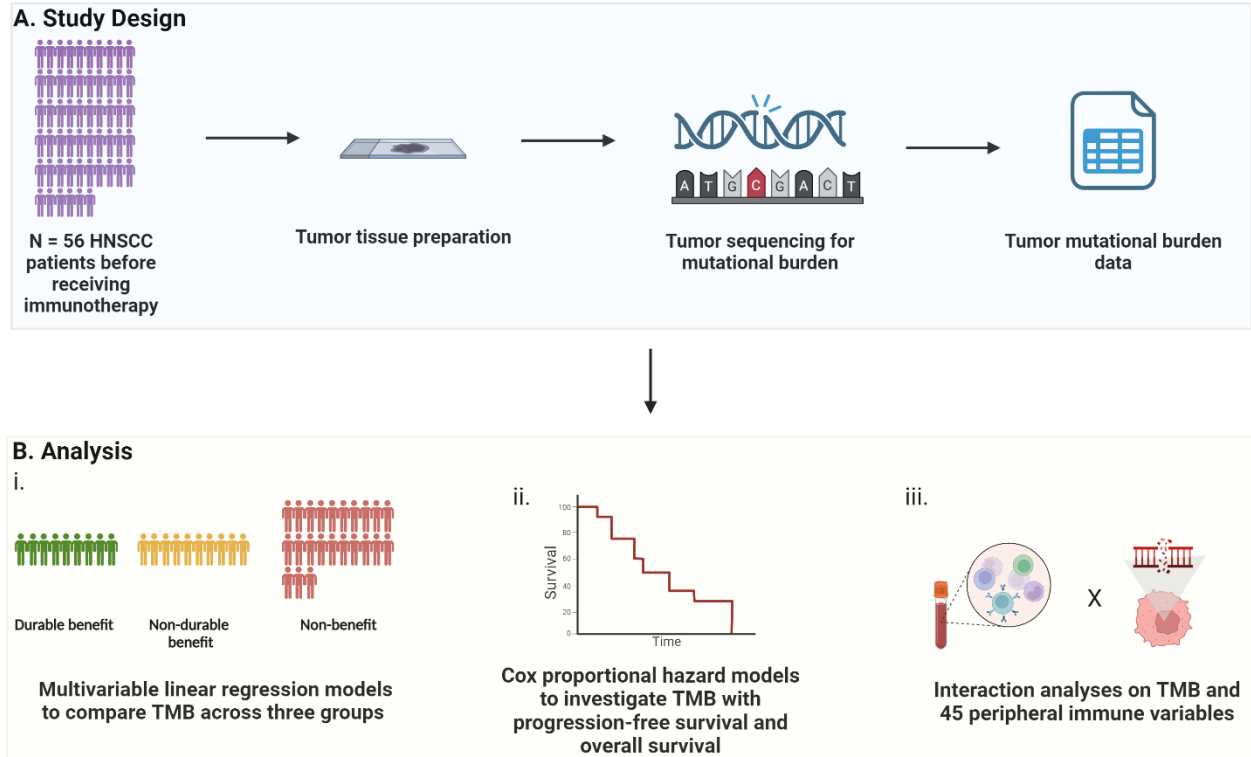

**Supplementary Figure 1.** Study design and analysis pipelines for TMB.

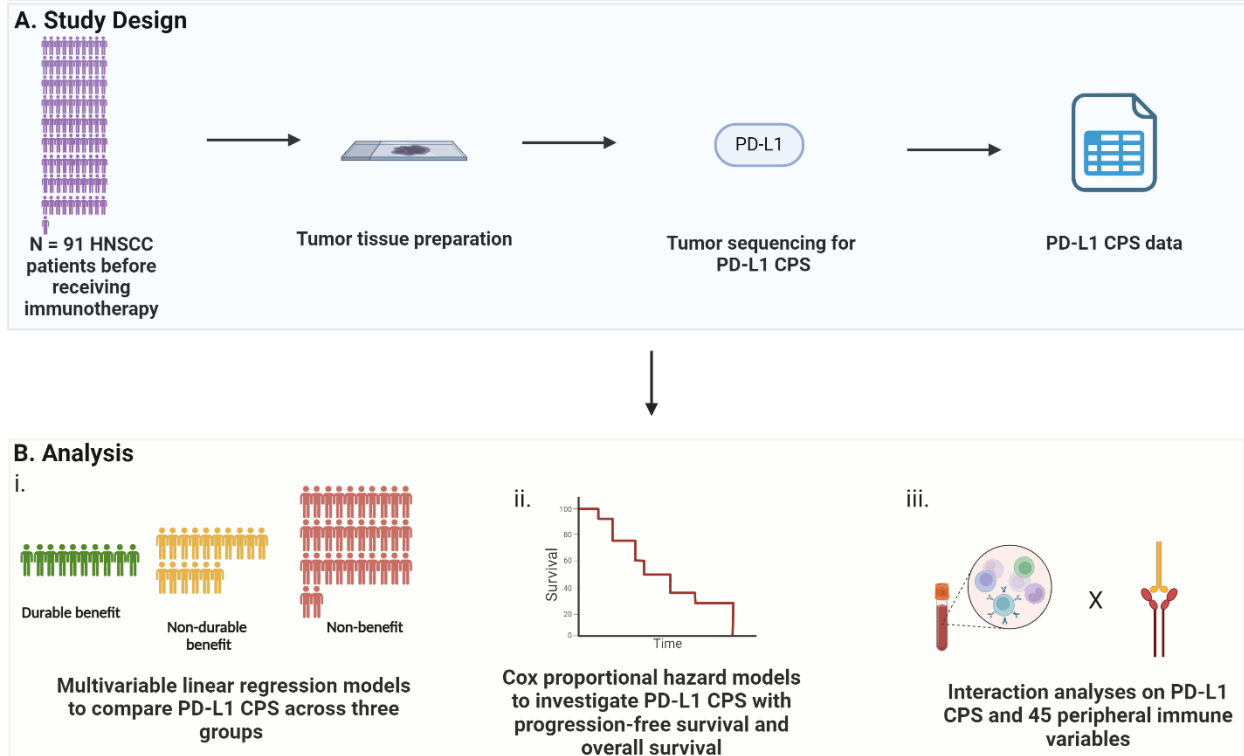

**Supplementary Figure 2.** Study design and analysis pipelines for PD-L1 CPS.

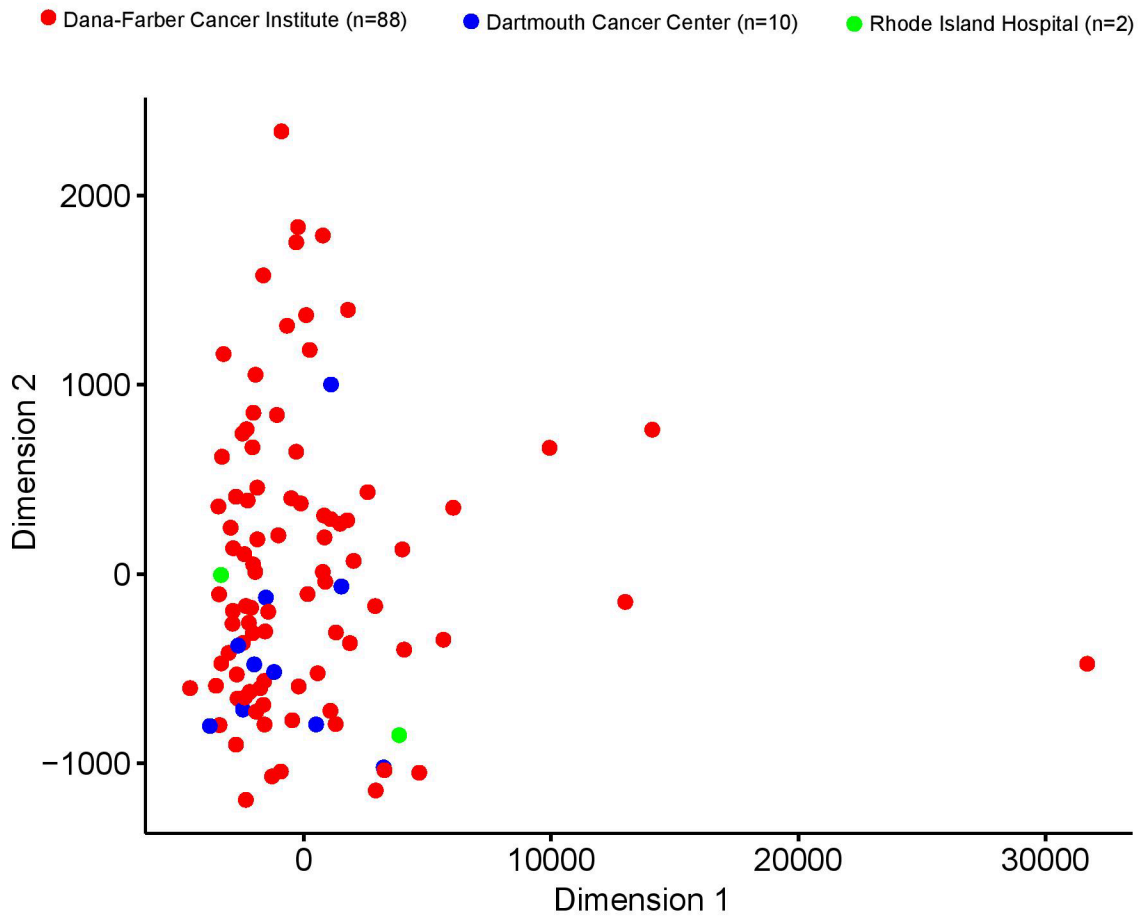

**Supplementary Figure 3.** Multidimensional scaling plot using baseline methylation cytometry immune profiles on all subjects colored by three centers.

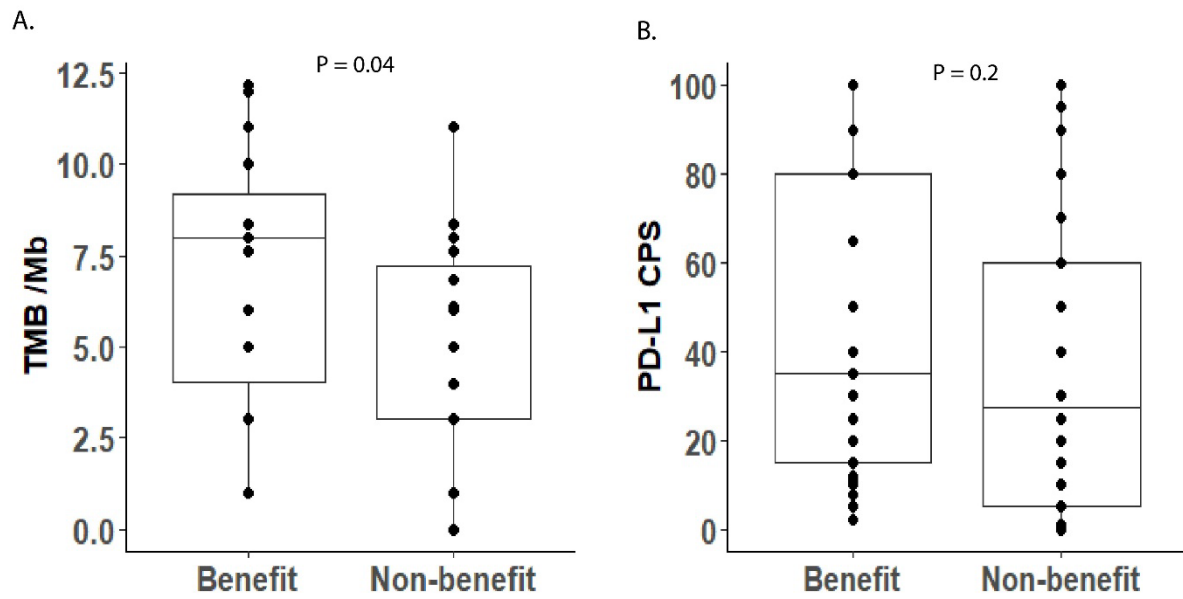

**Supplementary Figure 4.** TMB and PDL1-CPS comparison between the benefit and non-benefit groups.

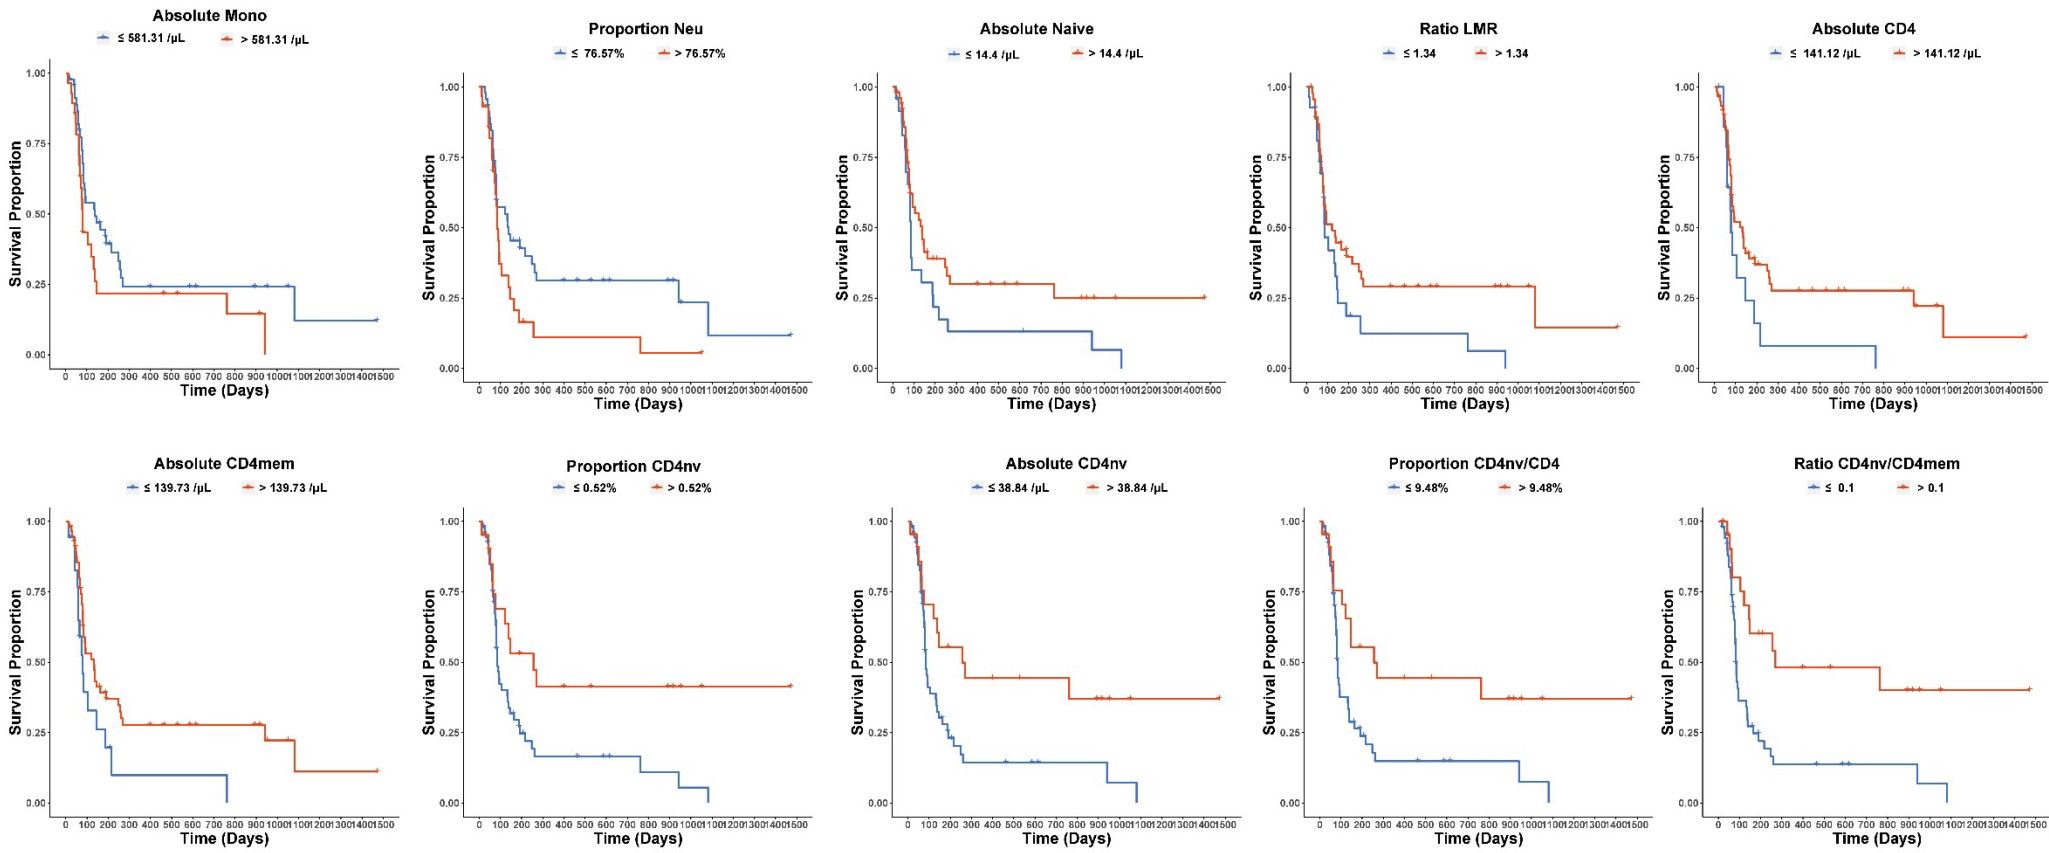

Supplementary Figure 5. Kaplan–Meier plots for progression-free survival in anti-PD-1 monotherapy.

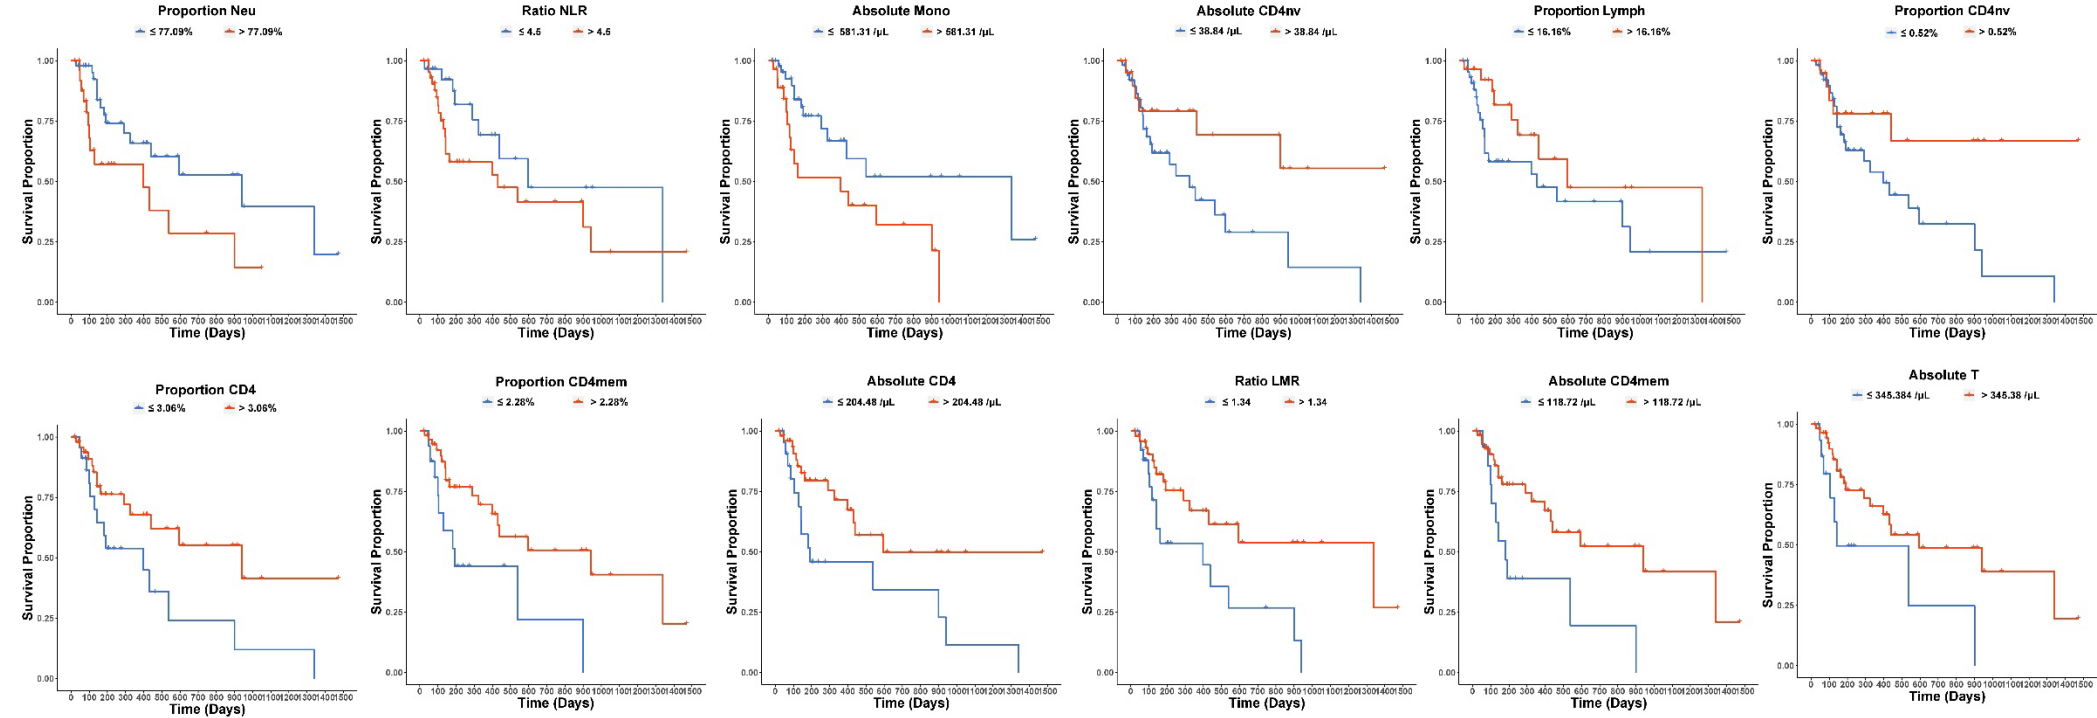

Supplementary Figure 6. Kaplan–Meier plots for overall survival in anti-PD-1 monotherapy.



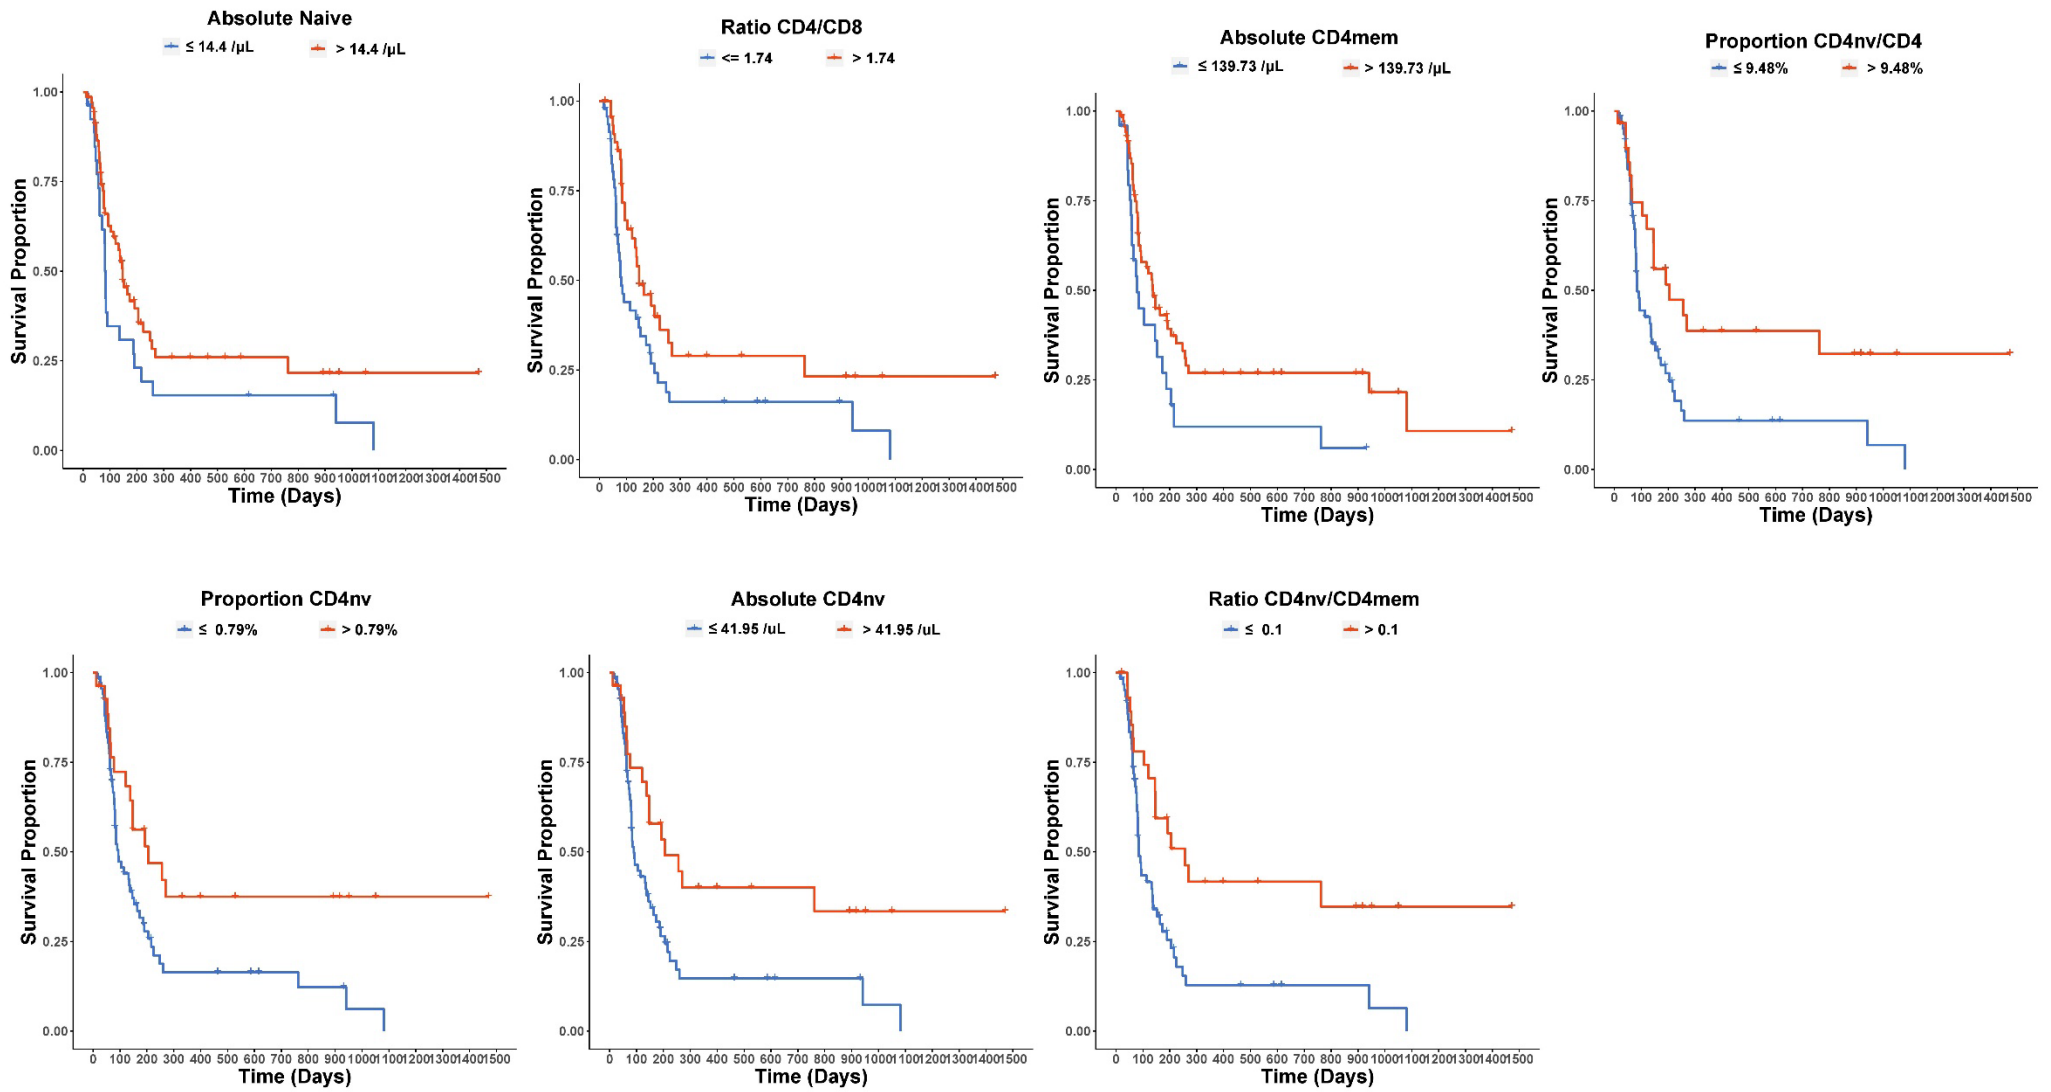

Supplementary Figure 7. Kaplan–Meier plots for progression-free survival in all-treatment.

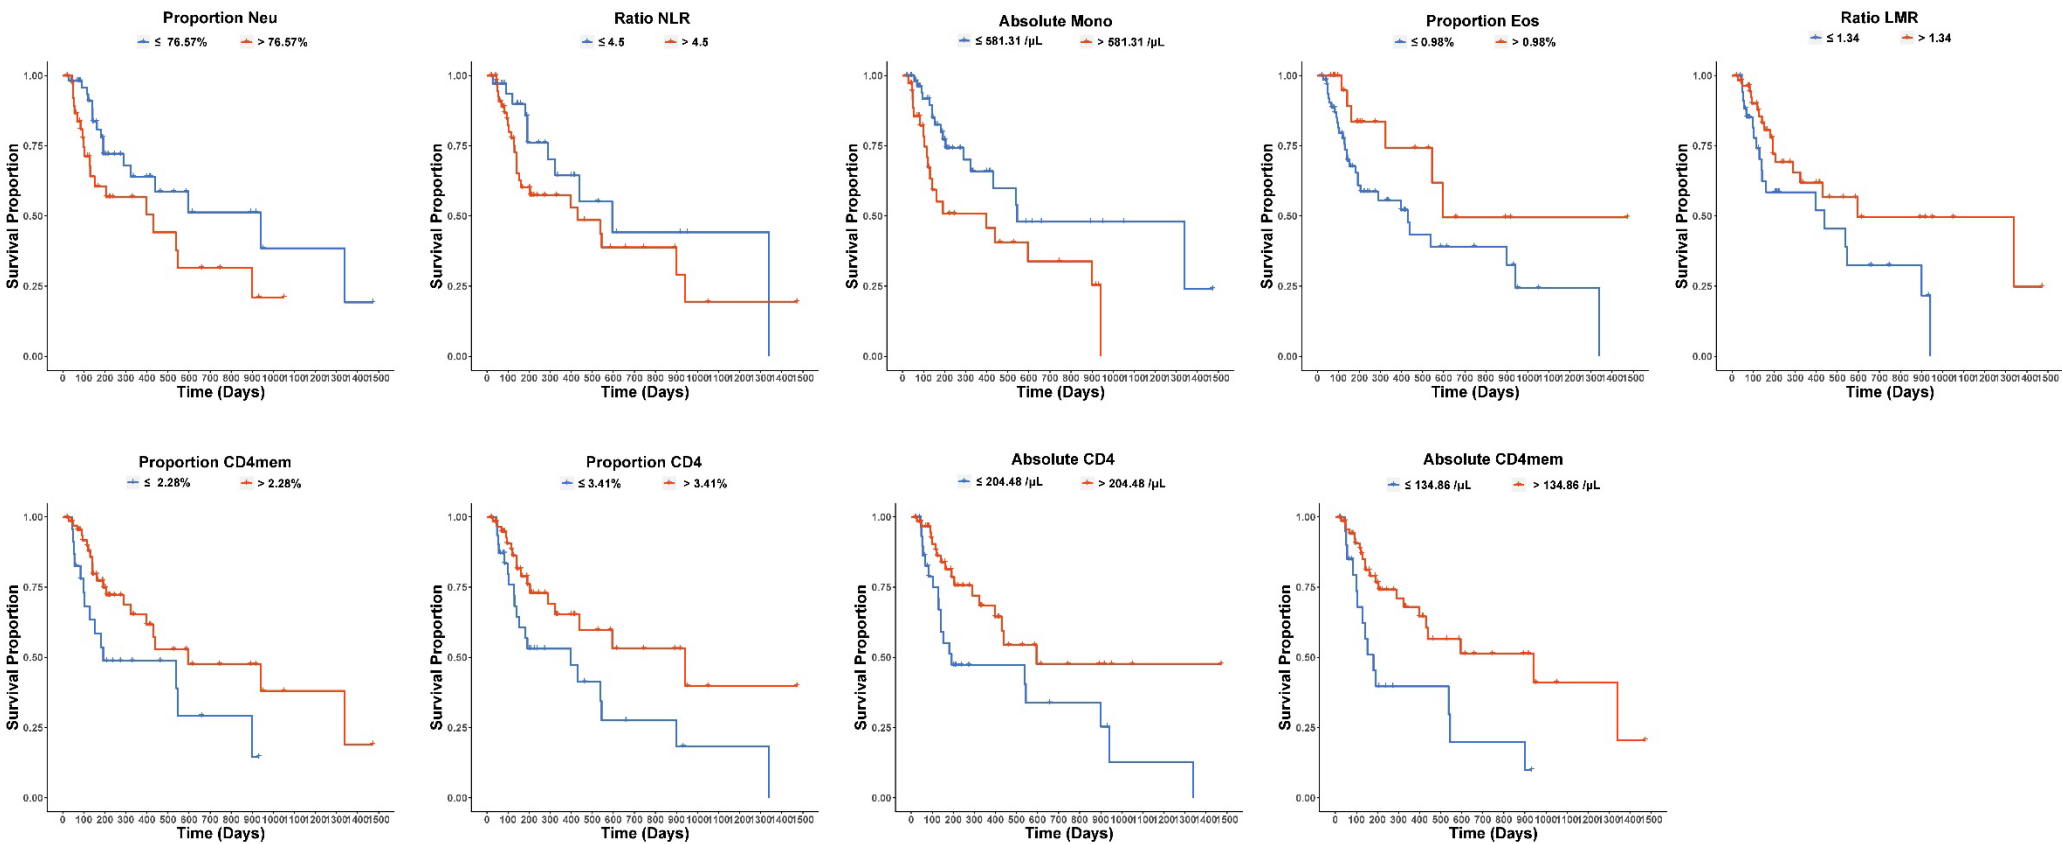

Supplementary Figure 8. Kaplan–Meier plots for overall survival in all-treatment.

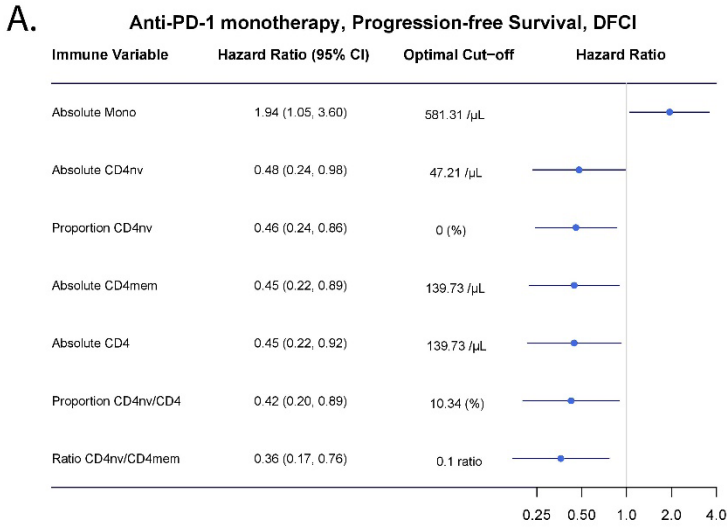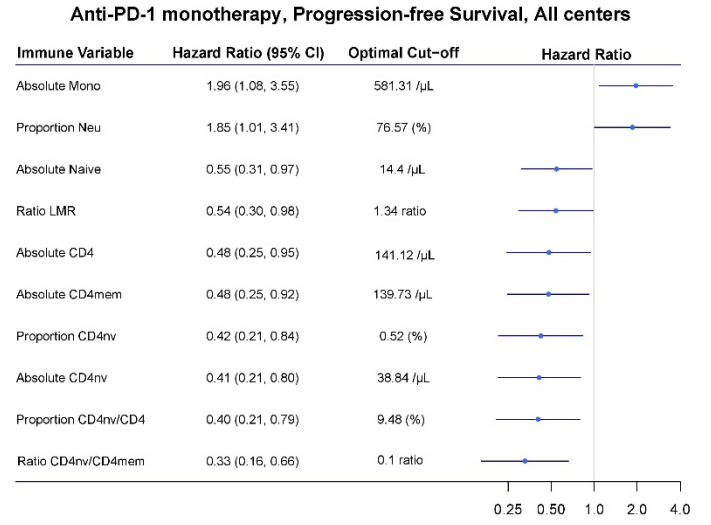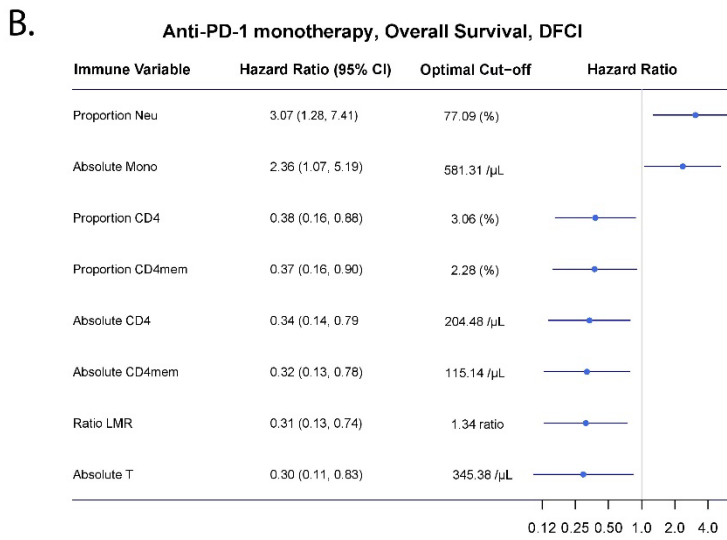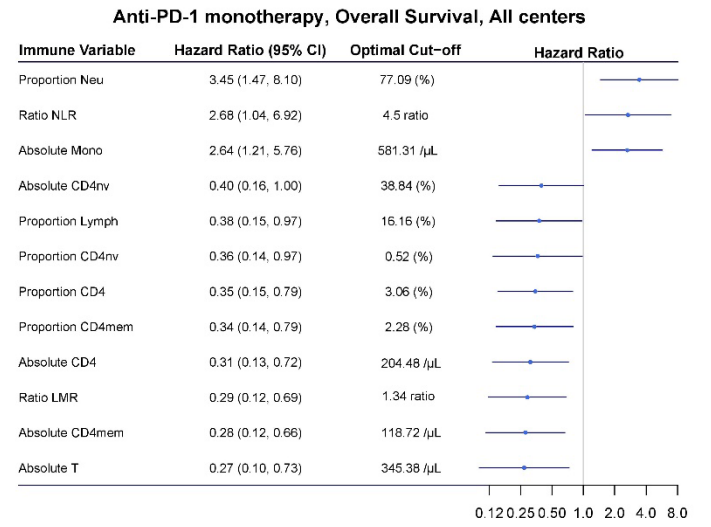

**Supplementary Figure 9.** The association between immune variables and **A.** PFS and **B.** OS in DFCI patients vs all patients from three centers.

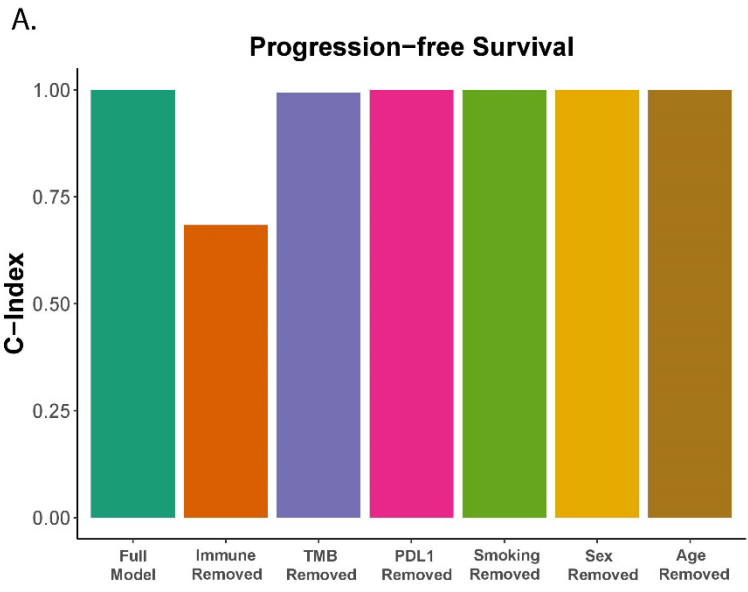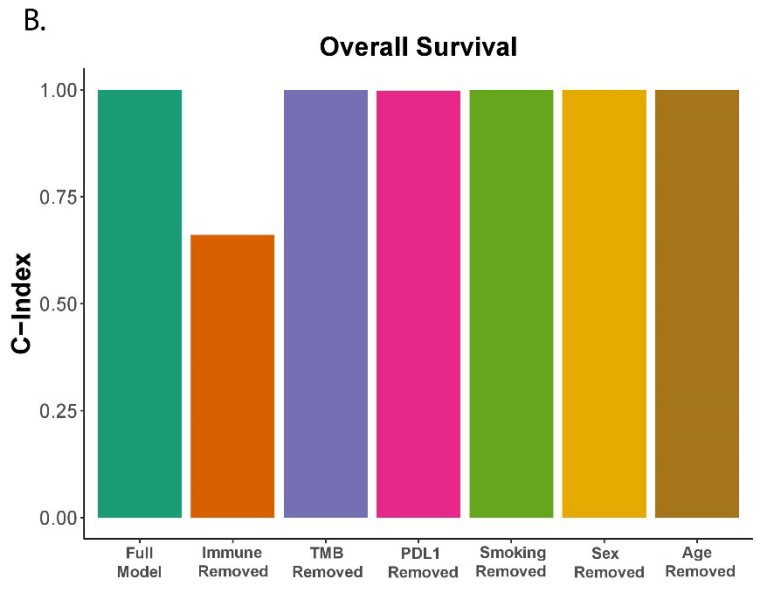

**Supplementary Figure 10.** C-index comparison between the full model and variable removed models on **A.** PFS; and **B.** OS.

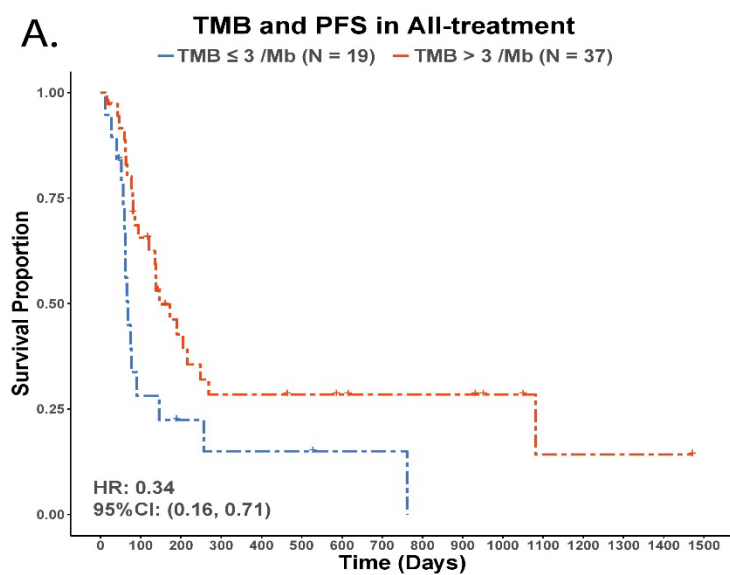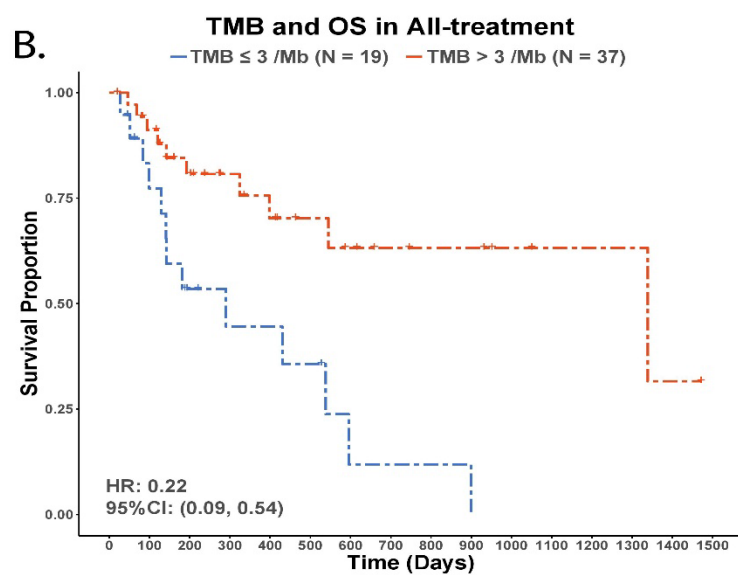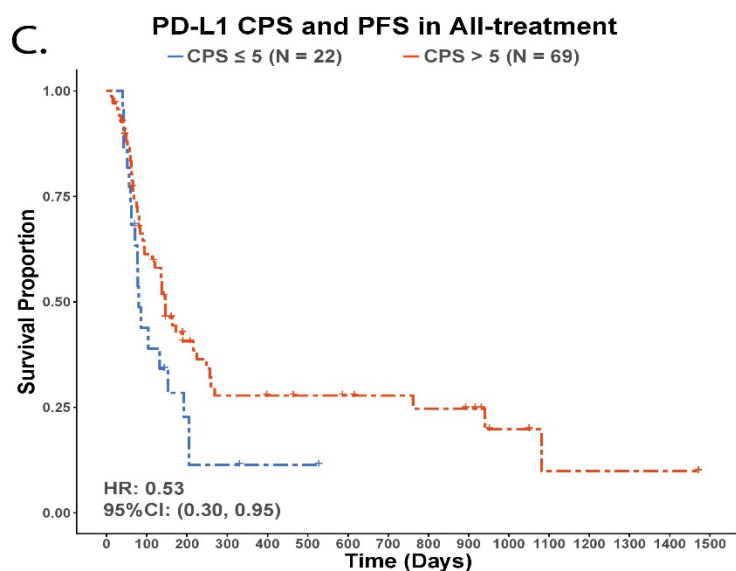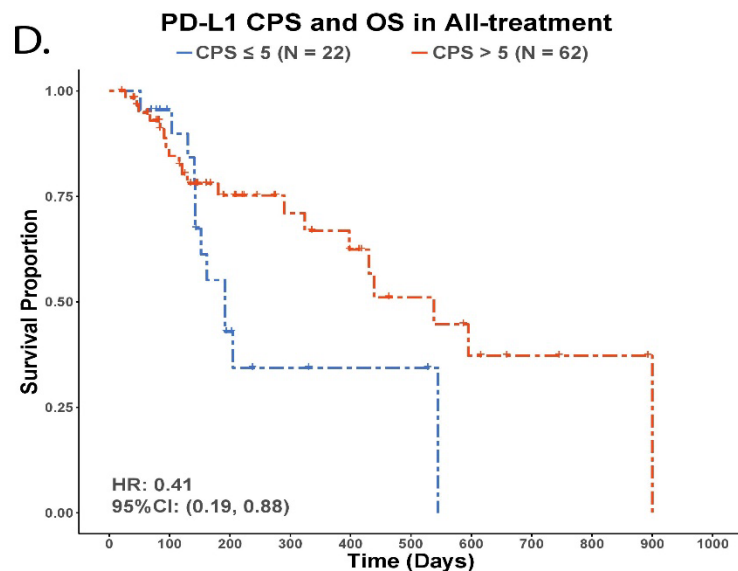

**Supplementary Figure 11.** TMB and PD-L1 CPS with survival outcomes in all-treatment.

### A. TMB and PFS in anti-PD-1 monotherapy stratified by median absolute NK count

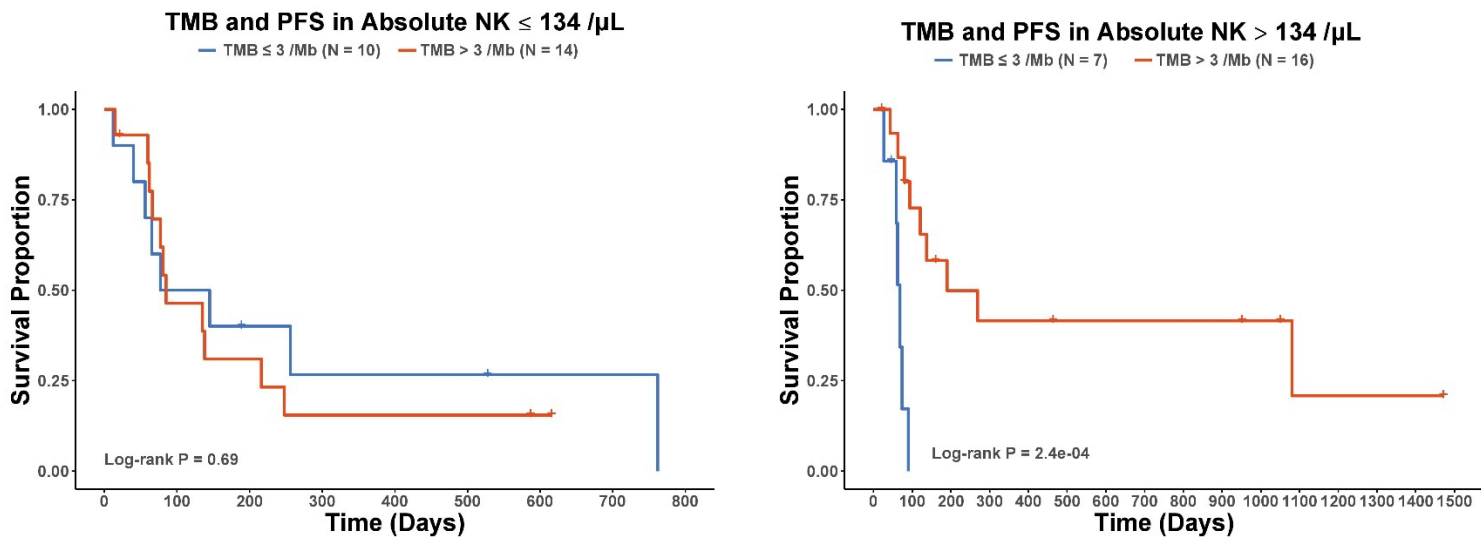

### B. TMB and PFS in anti-PD-1 monotherapy stratified by median absolute Neu count

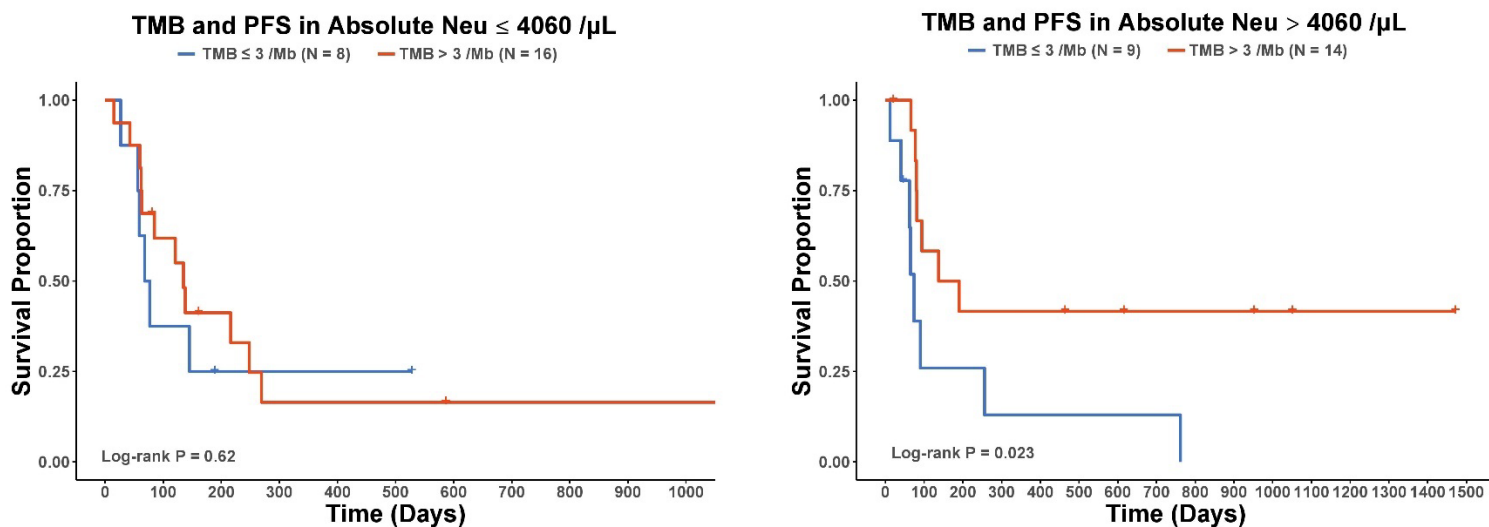

**Supplementary Figure 12.** TMB and progression-free survival stratified by median NK count and Neu count.

A.

| Immune Variable      | Pearson's r | P-value |
|----------------------|-------------|---------|
| Proportion NK        | 0.28        | 0.04    |
| Proportion Mono      | 0.21        | 0.12    |
| Ratio CD8nv/CD8mem   | 0.21        | 0.14    |
| Absolute NK          | 0.20        | 0.15    |
| Proportion CD4nv/CD4 | -0.20       | 0.15    |

B.

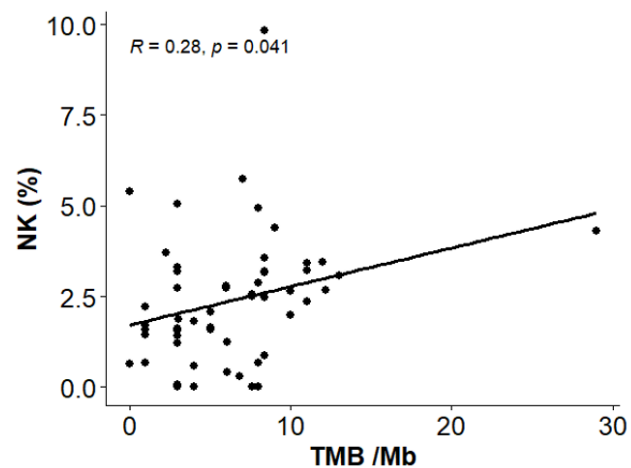

**Supplementary Figure 13. A.** Top 5 association between pretreatment TMB and immune variables; **B.** Correlation scatter plot between pretreatment NK (%) and TMB with Pearson's correlation coefficient and p-value.

| Type               | Variable name          | Description                                 | Calculation                                                                                                                  |
|--------------------|------------------------|---------------------------------------------|------------------------------------------------------------------------------------------------------------------------------|
| Proportion         | Proportion Bas         | Basophil proportion                         | proportion of basophils per extended deconvolution                                                                           |
| Proportion         | Proportion Bmem        | B memory cell proportion                    | proportion of B memory cells per extended deconvolution                                                                      |
| Proportion         | Proportion Bnv         | B naïve cell proportion                     | proportion of B naïve cells per extended deconvolution                                                                       |
| Proportion         | Proportion CD4mem      | CD4T memory cell proportion                 | proportion of CD4T memory cells per extended deconvolution                                                                   |
| Proportion         | Proportion CD4nv       | CD4T naïve cell proportion                  | proportion of CD4T naïve cells per extended deconvolution                                                                    |
| Proportion         | Proportion CD8mem      | CD8T memory cell proportion                 | proportion of CD8memory cells per extended deconvolution                                                                     |
| Proportion         | Proportion CD8nv       | CD8T naïve cell proportion                  | proportion of CD8naïve cells per extended deconvolution                                                                      |
| Proportion         | Proportion Eos         | Eosinophil proportion                       | proportion of eosinophils per extended deconvolution                                                                         |
| Proportion         | Proportion Neu         | Neutrophil proportion                       | proportion of neutrophils per extended deconvolution                                                                         |
| Proportion         | Proportion NK          | Natural killer proportion                   | proportion of natural killer cells (NK cells) per extended deconvolution                                                     |
| Proportion         | Proportion Mono        | Monocyte proportion                         | proportion of monocytes per extended deconvolution                                                                           |
| Proportion         | Proportion Treg        | T regulatory cell proportion                | proportion of Tregs per extended deconvolution                                                                               |
| Derived Proportion | Proportion CD4nv/CD4   | CD4T naïve over total CD4T cell proportion  | CD4 naïve/Total CD4 (naïve + memory + Treg) -- calculated using proportions * 100                                            |
| Derived Proportion | Proportion CD8nv/CD8   | CD8T naïve over total CD8T cell proportion  | CD8naïve/Total CD8 (naïve + memory) -- calculated using proportions * 100                                                    |
| Derived Proportion | Proportion Treg/CD4    | Treg over total CD4T cell proportion        | Treg/Total CD4 (naïve + memory + Treg) -- calculated using proportions * 100                                                 |
| Derived Proportion | Proportion Bnv/B       | B naïve over total B cell proportion        | B naïve/total B cell (naïve+memory B cells) -- calculated using proportions * 100                                            |
| Derived Proportion | Proportion B           | Total B cell proportion                     | Bnv + Bmem -- calculated using proportions                                                                                   |
| Derived Proportion | Proportion CD4         | Total CD4T cell proportion                  | CD4nv + CD4mem + Treg -- calculated using proportions                                                                        |
| Derived Proportion | Proportion CD8         | Total CD8T cell proportion                  | CD8nv + CD8mem -- calculated using proportions                                                                               |
| Derived Proportion | Proportion Naive       | Total naïve cell proportion                 | Bnv + CD4nv + CD8nv -- calculated using proportions                                                                          |
| Derived Proportion | Proportion Lymph       | Total lymphocyte proportion                 | NK + Bmem + Bnv + CD4mem + CD4nv + CD8mem + CD8nv +Treg -- calculated using proportions                                      |
| Derived Proportion | Proportion Naive/Lymph | Total naïve cell over lymphocyte proportion | totNaive/totLymph -- calculated using proportions * 100                                                                      |
| Absolute Count     | Absolute Bas           | Absolute basophil count                     | Absolute basophil count per ul --calculated by multiplying proportion with the total cell count                              |
| Absolute Count     | Absolute Bmem          | Absolute B memory cell count                | Absolute B memory count per ul --calculated by multiplying proportion with the total cell count                              |
| Absolute Count     | Absolute Bnv           | Absolute B naïve cell count                 | Absolute B naïve count per ul --calculated by multiplying proportion with the total cell count                               |
| Absolute Count     | Absolute CD4mem        | Absolute CD4T memory cell count             | Absolute CD4T memory count per ul --calculated by multiplying proportion with the total cell count                           |
| Absolute Count     | Absolute CD4nv         | Absolute CD4T naïve cell count              | Absolute CD4T naïve count per ul --calculated by multiplying proportion with the total cell count                            |
| Absolute Count     | Absolute CD8mem        | Absolute CD8T memory cell count             | Absolute CD8T memory count per ul --calculated by multiplying proportion with the total cell count                           |
| Absolute Count     | Absolute CD8nv         | Absolute CD8T naïve cell count              | Absolute CD8T naïve count per ul --calculated by multiplying proportion with the total cell count                            |
| Absolute Count     | Absolute Eos           | Absolute eosinophil count                   | Absolute eosinophil count per ul --calculated by multiplying proportion with the total cell count                            |
| Absolute Count     | Absolute Mono          | Absolute monocyte count                     | Absolute monocyte count per ul --calculated by multiplying proportion with the total cell count                              |
| Absolute Count     | Absolute Neu           | Absolute neutrophil count                   | Absolute neutrophil count per ul --calculated by multiplying proportion with the total cell count                            |
| Absolute Count     | Absolute NK            | Absolute natural killer cell count          | Absolute natural killer cell (NK) count per ul --calculated by multiplying proportion with the total cell count              |
| Absolute Count     | Absolute Treg          | Absolute T regulatory cell count            | Absolute Treg count per ul --calculated by multiplying proportion with the total cell count                                  |
| Derived Count      | Absolute Lymph         | Absolute lymphocyte cell count              | Counts of NK + B naïve + B memory + CD4 naïve +CD4 memory+ CD8 naïve + CD8 memory + Treg -- calculated using absolute counts |
| Derived Count      | Absolute T             | Absolute total T cell count                 | Counts of CD4 naïve+CD4 memory + CD8 naïve+CD8 memory + Treg -- calculated using absolute counts                             |
| Derived Count      | Absolute CD4           | Absolute total CD4T cell count              | (CD4nv + CD4mem + Treg)*Total_Cell_Count --calculated by multiplying proportion with the total cell count                    |
| Derived Count      | Absolute CD8           | Absolute total CD8T cell count              | (CD8nv + CD8mem)*Total_Cell_Count --calculated by multiplying proportion with the total cell count                           |
| Derived Count      | Absolute B             | Absolute total B cell count                 | (Bnv + Bmem) * Total_Cell_Count --calculated by multiplying proportion with the total cell count                             |
| Derived Count      | Absolute Naive         | Absolute total naïve cell count             | (Bnv + CD4nv + CD8nv)* Total_Cell_Count --calculated by multiplying proportion with the total cell count                     |
| Derived Ratio      | Ratio CD4/CD8          | CD4T to CD8T cell ratio                     | Total CD4 (naïve + memory +Treg)/total CD8 (naïve + memory) -- calculated using proportions                                  |
| Derived Ratio      | Ratio CD4nv/CD4mem     | CD4T naïve to memory cell ratio             | CD4 naïve/CD4 memory -- calculated using proportions                                                                         |
| Derived Ratio      | Ratio CD8nv/CD8mem     | CD8T naïve to memory cell ratio             | CD8naïve/CD8 memory -- calculated using proportions                                                                          |
| Derived Ratio      | Ratio NLR              | Neutrophil to lymphocyte ratio              | Neutrophil/ (NK +B naïve + B memory +CD4 naïve + CD4 memory +CD8 naïve + CD8 memory +Treg) -- calculated using proportions   |
| Derived Ratio      | Ratio LMR              | Lymphocyte to monocyte ratio                | (NK+B naïve + B memory + CD4 naïve +CD4 memory+ CD8 naïve + CD8 memory +Treg) / monocyte --calculated using proportions      |

**Supplementary Table 1.** Immune variables abbreviations, and their calculations.



|                       | Mean |       | Median |       | Percentile range (2.5–97.5) |               |
|-----------------------|------|-------|--------|-------|-----------------------------|---------------|
|                       | WHI  | HNSCC | WHI    | HNSCC | WHI                         | HNSCC         |
| <b>WBC</b>            | 6276 | 7207  | 6000   | 5850  | (3387, 10680)               | (3200, 17808) |
| <b>Neutrophil</b>     |      |       |        |       |                             |               |
| Cells/ $\mu$ l        | 3642 | 5595  | 3467   | 4256  | (1334, 7202)                | (2387, 15635) |
| %                     | 56.8 | 75.1  | 57.5   | 75.7  | (31.6, 76.8)                | (59.2, 91.8)  |
| <b>Basophil</b>       |      |       |        |       |                             |               |
| Cells/ $\mu$ l        | 66   | 27    | 42     | 0     | (18, 243)                   | (0, 254)      |
| %                     | 1.1  | 0.36  | 0.6    | 0     | (0.48, 3.5)                 | (0, 2.4)      |
| <b>Eosinophil</b>     |      |       |        |       |                             |               |
| Cells/ $\mu$ l        | 140  | 74    | 112    | 7     | (19, 444)                   | (0, 594)      |
| %                     | 2.3  | 1.1   | 2      | 0.1   | (0.42, 6.5)                 | (0, 7.6)      |
| <b>Monocyte</b>       |      |       |        |       |                             |               |
| Cells/ $\mu$ l        | 546  | 605   | 524    | 548   | (262, 961)                  | (272, 1192)   |
| %                     | 8.9  | 9.3   | 8.7    | 8.7   | (4.9, 14.3)                 | (3.7, 16.6)   |
| <b>Lymphocyte</b>     |      |       |        |       |                             |               |
| Cells/ $\mu$ l        | 1921 | 906   | 1823   | 878   | (842, 3621)                 | (194, 1910)   |
| %                     | 31.5 | 14.2  | 30.1   | 13.5  | (14.4, 54.1)                | (2.9, 27.0)   |
| <b>CD4T</b>           |      |       |        |       |                             |               |
| Cells/ $\mu$ l        | 860  | 376   | 795    | 318   | (296, 1799)                 | (2, 974)      |
| %                     | 14.1 | 5.9   | 13.3   | 5.1   | (2.8, 21.2)                 | (0, 15.5)     |
| <b>CD4T naïve</b>     |      |       |        |       |                             |               |
| Cells/ $\mu$ l        | 200  | 46    | 132    | 6     | (35, 686)                   | (0, 251)      |
| %                     | 3.3  | 0.7   | 2.3    | 0.1   | (0.9, 11.4)                 | (0, 3.9)      |
| <b>CD4T memory</b>    |      |       |        |       |                             |               |
| Cells/ $\mu$ l        | 610  | 323   | 564    | 248   | (171, 1328)                 | (0, 787)      |
| %                     | 10.1 | 5.1   | 9.4    | 5     | (2.8, 21.2)                 | (0, 11.9)     |
| <b>T regulatory</b>   |      |       |        |       |                             |               |
| Cells/ $\mu$ l        | 50   | 6.5   | 47     | 0     | (27, 88)                    | (0, 87)       |
| %                     | 0.8  | 0.1   | 0.78   | 0     | (0.78, 0.78)                | (0, 0.9)      |
| <b>CD8T</b>           |      |       |        |       |                             |               |
| Cells/ $\mu$ l        | 499  | 275   | 397    | 171   | (85, 1473)                  | (0.4, 1011)   |
| %                     | 8.1  | 4.3   | 6.7    | 3.5   | (1.6, 22.4)                 | (0, 14)       |
| <b>CD8T naïve</b>     |      |       |        |       |                             |               |
| Cells/ $\mu$ l        | 80   | 6     | 58     | 0     | (28, 247)                   | (0, 73)       |
| %                     | 1.3  | 0.1   | 0.8    | 0     | (0.8, 4.1)                  | (0, 1)        |
| <b>CD8T memory</b>    |      |       |        |       |                             |               |
| Cells/ $\mu$ l        | 418  | 269   | 306    | 163   | (37, 1386)                  | (0.4, 1011)   |
| %                     | 6.8  | 4.2   | 5.3    | 3.2   | (0.8, 21.6)                 | (0, 14)       |
| <b>B cell</b>         |      |       |        |       |                             |               |
| Cells/ $\mu$ l        | 227  | 87    | 189    | 53    | (50, 640)                   | (0, 408)      |
| %                     | 3.8  | 1.3   | 3.2    | 0.9   | (0.81, 9.8)                 | (0, 4.2)      |
| <b>B naïve</b>        |      |       |        |       |                             |               |
| Cells/ $\mu$ l        | 140  | 61    | 107    | 21    | (23, 503)                   | (0, 368)      |
| %                     | 2.3  | 0.91  | 1.8    | 0.34  | (0.48, 7.1)                 | (0, 3.8)      |
| <b>B memory</b>       |      |       |        |       |                             |               |
| Cells/ $\mu$ l        | 87   | 26    | 67     | 14    | (16, 256)                   | (0, 129)      |
| %                     | 1.4  | 0.41  | 1.2    | 0.22  | (0.32, 4.1)                 | (0, 1.9)      |
| <b>Natural killer</b> |      |       |        |       |                             |               |
| Cells/ $\mu$ l        | 335  | 169   | 308    | 148   | (95, 762)                   | (0, 422)      |
| %                     | 5.5  | 2.7   | 5.1    | 2.5   | (1.6, 11)                   | (0, 6.8)      |

**Supplementary Table 2.** Immune profile comparison between HNSCC patients and WHI subjects.

| <b>TMB Subjects' Characteristics</b>                | <b>N=56</b> | <b>%</b> |
|-----------------------------------------------------|-------------|----------|
| <b>Recruitment Site</b>                             |             |          |
| Dana-Farber Cancer Institute                        | 56          | 100.0    |
| Dartmouth Cancer Center                             | 0           | 0        |
| Rhode Island Hospital                               | 0           | 0        |
| <b>Sex</b>                                          |             |          |
| Female                                              | 12          | 21.4     |
| Male                                                | 44          | 78.6     |
| <b>Age, in years</b>                                |             |          |
| Mean (standard deviation)                           | 64.1 (12.4) |          |
| <b>Location of primary tumor</b>                    |             |          |
| Oral cavity                                         | 28          | 50.0     |
| Oropharynx                                          | 19          | 33.9     |
| Larynx                                              | 4           | 7.1      |
| Hypopharynx                                         | 1           | 1.8      |
| Paranasal sinuses and nasal cavity                  | 2           | 3.6      |
| Unknown                                             | 2           | 3.6      |
| <b>HPV status in oropharyngeal carcinomas (=19)</b> |             |          |
| Positive                                            | 18          | 94.7     |
| Negative                                            | 1           | 5.3      |
| Missing                                             | 0           | 0        |
| <b>Smoking History</b>                              |             |          |
| Current/former smoker                               | 27          | 48.2     |
| Never smoker                                        | 25          | 44.6     |
| Missing                                             | 4           | 7.1      |
| <b>Initial Treatment Type</b>                       |             |          |
| Immunotherapy only                                  | 49          | 87.5     |
| Immunotherapy + Chemotherapy                        | 6           | 10.7     |
| Immunotherapy + EGFRi                               | 1           | 1.8      |
| <b>Progression-free survival, in days</b>           |             |          |
| Median                                              | 135         |          |
| <b>Overall survival, in days</b>                    |             |          |
| Median                                              | 545         |          |
| <b>Vital Status</b>                                 |             |          |
| Alive                                               | 33          | 58.9     |
| Deceased                                            | 23          | 41.1     |
| <b>Still continuing treatment among alive (=33)</b> |             |          |
| Yes                                                 | 26          | 78.8     |
| No                                                  | 7           | 21.2     |

**Supplementary Table 3.** Baseline characteristics of the study population for TMB.

| <b>PDL1 Subjects' Characteristics</b>               | <b>N=91</b> | <b>%</b> |
|-----------------------------------------------------|-------------|----------|
| <b>Recruitment Site</b>                             |             |          |
| Dana-Farber Cancer Institute                        | 85          | 93.4     |
| Dartmouth Cancer Center                             | 4           | 4.4      |
| Rhode Island Hospital                               | 2           | 2.2      |
| <b>Sex</b>                                          |             |          |
| Female                                              | 24          | 26.4     |
| Male                                                | 67          | 73.6     |
| <b>Age, in years</b>                                |             |          |
| Mean (standard deviation)                           | 64.5 (11.8) |          |
| <b>Location of primary tumor</b>                    |             |          |
| Oral cavity                                         | 39          | 42.9     |
| Oropharynx                                          | 31          | 34.1     |
| Larynx                                              | 7           | 7.7      |
| Hypopharynx                                         | 7           | 7.7      |
| Paranasal sinuses and nasal cavity                  | 3           | 3.3      |
| Unknown                                             | 4           | 4.4      |
| <b>HPV status in oropharyngeal carcinomas (=31)</b> |             |          |
| Positive                                            | 24          | 77.4     |
| Negative                                            | 6           | 19.4     |
| Missing                                             | 1           | 3.2      |
| <b>Smoking History</b>                              |             |          |
| Current/former smoker                               | 48          | 52.7     |
| Never smoker                                        | 38          | 41.8     |
| Missing                                             | 5           | 5.5      |
| <b>Initial Treatment Type</b>                       |             |          |
| Immunotherapy only                                  | 73          | 80.2     |
| Immunotherapy + Chemotherapy                        | 17          | 18.7     |
| Immunotherapy + EGFRi                               | 1           | 1.1      |
| <b>Progression-free survival, in days</b>           |             |          |
| Median                                              | 135         |          |
| <b>Overall survival, in days</b>                    |             |          |
| Median                                              | 545         |          |
| <b>Vital Status</b>                                 |             |          |
| Alive                                               | 57          | 62.6     |
| Deceased                                            | 34          | 37.4     |
| <b>Still continuing treatment among alive (=57)</b> |             |          |
| Yes                                                 | 43          | 75.4     |
| No                                                  | 14          | 24.6     |

**Supplementary Table 4.** Baseline characteristics of the study population for PD-L1 CPS.

A.

| Immune Variable      | HR     | Lower  | Higher | P-value | Cut-off | FDR      |
|----------------------|--------|--------|--------|---------|---------|----------|
| Ratio CD4nv/CD4mem   | 0.3278 | 0.1629 | 0.6596 | 0.0018  | 0.1     | 0.0684   |
| Proportion CD4nv/CD4 | 0.4046 | 0.2065 | 0.7924 | 0.0083  | 9.48    | 0.114    |
| Absolute CD4nv       | 0.4118 | 0.2115 | 0.8017 | 0.009   | 38.84   | 0.114    |
| Proportion CD4nv     | 0.4232 | 0.2142 | 0.836  | 0.0133  | 0.52    | 0.12635  |
| Absolute Mono        | 1.9609 | 1.0842 | 3.5466 | 0.0259  | 581.31  | 0.170729 |
| Absolute CD4mem      | 0.4788 | 0.2484 | 0.923  | 0.0279  | 139.73  | 0.170729 |
| Absolute CD4         | 0.4829 | 0.2457 | 0.949  | 0.0347  | 141.12  | 0.170729 |
| Absolute Naive       | 0.5459 | 0.3086 | 0.9657 | 0.0375  | 14.4    | 0.170729 |
| Ratio LMR            | 0.5393 | 0.2969 | 0.9797 | 0.0426  | 1.34    | 0.170729 |
| Proportion Neu       | 1.8505 | 1.0054 | 3.4061 | 0.048   | 76.57   | 0.170729 |

B.

| Immune Variable   | HR     | Lower  | Higher | P-value | Cut-off | FDR      |
|-------------------|--------|--------|--------|---------|---------|----------|
| Absolute CD4mem   | 0.2782 | 0.1167 | 0.663  | 0.0039  | 118.72  | 0.05985  |
| Proportion Neu    | 3.4455 | 1.4661 | 8.0977 | 0.0045  | 77.09   | 0.05985  |
| Ratio LMR         | 0.2909 | 0.1234 | 0.6856 | 0.0048  | 1.34    | 0.05985  |
| Absolute CD4      | 0.3102 | 0.1339 | 0.7187 | 0.0063  | 204.48  | 0.05985  |
| Absolute T        | 0.2708 | 0.1004 | 0.7304 | 0.0099  | 345.38  | 0.068875 |
| Proportion CD4    | 0.3456 | 0.1516 | 0.7883 | 0.0116  | 3.06    | 0.068875 |
| Proportion CD4mem | 0.3389 | 0.1446 | 0.7945 | 0.0128  | 2.28    | 0.068875 |
| Absolute Mono     | 2.641  | 1.2123 | 5.7535 | 0.0145  | 581.31  | 0.068875 |
| Ratio NLR         | 2.6837 | 1.0412 | 6.917  | 0.041   | 4.5     | 0.153036 |
| Proportion Lymph  | 0.3767 | 0.1458 | 0.9737 | 0.0439  | 16.16   | 0.153036 |
| Proportion CD4nv  | 0.3641 | 0.136  | 0.9747 | 0.0443  | 0.52    | 0.153036 |
| Absolute CD4nv    | 0.3953 | 0.1565 | 0.9985 | 0.0496  | 38.84   | 0.157067 |

C.

| Immune Variable      | HR     | Lower  | Higher | P-value | Cut-off | FDR      |
|----------------------|--------|--------|--------|---------|---------|----------|
| Ratio CD4nv/CD4mem   | 0.4245 | 0.2346 | 0.768  | 0.0046  | 0.1     | 0.1444   |
| Absolute CD4nv       | 0.4726 | 0.2634 | 0.848  | 0.012   | 41.95   | 0.1444   |
| Proportion CD4nv/CD4 | 0.4888 | 0.2749 | 0.869  | 0.0148  | 9.48    | 0.1444   |
| Proportion CD4nv     | 0.4827 | 0.2655 | 0.8774 | 0.0169  | 0.79    | 0.1444   |
| Ratio CD4/CD8        | 0.5347 | 0.317  | 0.902  | 0.019   | 1.74    | 0.1444   |
| Absolute CD4mem      | 0.5119 | 0.2831 | 0.9257 | 0.0267  | 139.73  | 0.1691   |
| Absolute Naive       | 0.5868 | 0.3479 | 0.9898 | 0.0457  | 14.4    | 0.183667 |

D.

| Immune Variable   | HR     | Lower  | Higher | P-value | Cut-off | FDR      |
|-------------------|--------|--------|--------|---------|---------|----------|
| Absolute CD4mem   | 0.2837 | 0.1319 | 0.6105 | 0.0013  | 134.86  | 0.0494   |
| Absolute CD4      | 0.3113 | 0.1432 | 0.677  | 0.0032  | 204.48  | 0.0608   |
| Proportion Neu    | 2.9858 | 1.3702 | 6.5067 | 0.0059  | 76.57   | 0.074733 |
| Proportion CD4    | 0.3673 | 0.1736 | 0.7772 | 0.0088  | 3.41    | 0.0836   |
| Proportion CD4mem | 0.4016 | 0.1902 | 0.8477 | 0.0167  | 2.28    | 0.12692  |
| Ratio LMR         | 0.4101 | 0.1927 | 0.8729 | 0.0207  | 1.34    | 0.1311   |
| Absolute Mono     | 2.1683 | 1.1056 | 4.2526 | 0.0243  | 581.31  | 0.131914 |
| Ratio NLR         | 2.3629 | 1.0126 | 5.5139 | 0.0467  | 4.5     | 0.199289 |
| Proportion Eos    | 0.4088 | 0.169  | 0.9888 | 0.0472  | 0.98    | 0.199289 |

**Supplementary Table 5.** Significant associations between immune variables as binary variables and **A.** progression-free survival in anti-PD-1 monotherapy; **B.** overall survival in anti-PD-1 monotherapy; **C.** progression-free survival in all-treatment; **D.** overall survival in all-treatment.

A.

| <b>Immune Variable</b> | <b>HR</b> | <b>Lower</b> | <b>Higher</b> | <b>P-value</b> | <b>FDR</b> |
|------------------------|-----------|--------------|---------------|----------------|------------|
| Absolute NK            | 0.9982    | 0.9968       | 0.9997        | 0.0154         | 0.53775    |
| Absolute Neu           | 1         | 0.9999       | 1             | 0.0239         | 0.53775    |

B.

| <b>Immune Variable</b> | <b>HR</b> | <b>Lower</b> | <b>Higher</b> | <b>P-value</b> | <b>FDR</b> |
|------------------------|-----------|--------------|---------------|----------------|------------|
| Proportion Mono        | 1.0657    | 1.0227       | 1.1104        | 0.0025         | 0.1125     |
| Proportion CD4         | 1.0485    | 1.006        | 1.0928        | 0.0248         | 0.511364   |
| Absolute NK            | 0.998     | 0.996        | 0.9999        | 0.0425         | 0.511364   |

**Supplementary Table 6.** Significant TMB and peripheral immune variable interactions on **A.** progression-free survival; **B.** overall survival.
